# Supplementary material for: Effects of CYP3A5 Genotypes on Thrombocytopenia in Liver Transplantation Patients Treated with Tacrolimus
Source: MDPI journal article supplement (doi:10.3390/biomedicines11113088), 2023-11-17
Supplement: s1 [file s1]

**Table S1.** Platelet count on the 3rd POD of the 6 patients in the GG/GG group which developed hemorrhages.

| Patient                      | 1                   | 2                   | 3     | 4                  | 5                   | 6     |
|------------------------------|---------------------|---------------------|-------|--------------------|---------------------|-------|
| Platelet ( $\times 10^9/L$ ) | 38                  | 3                   | 100   | 67                 | 46                  | 54    |
| INR                          | 1.21                | 1.03                | 1.11  | 1.13               | 1.22                | 1.25  |
| Bleeding Sites               | Abdominal<br>Cavity | Abdominal<br>Cavity | Wound | Digestive<br>Tract | Abdominal<br>Cavity | Brain |

**Table S2.** A Comparison of risk factors between normal platelet and thrombocytopenia groups.

| Variables                                 | Total ( <i>n</i> = 100) | Normal platelets ( <i>n</i> = 14) | Thrombocytopenia ( <i>n</i> = 86) | <i>p</i> -value        |
|-------------------------------------------|-------------------------|-----------------------------------|-----------------------------------|------------------------|
| Age (years)                               | 52.33 ± 10.90           | 48.00 ± 13.03                     | 53.03 ± 10.43                     | 0.109 <sup>#</sup>     |
| Gender                                    |                         |                                   |                                   | 0.700 <sup>&amp;</sup> |
| Male ( <i>n</i> , %)                      | 82 (82%)                | 7 (50%)                           | 75 (87%)                          |                        |
| Female ( <i>n</i> , %)                    | 18 (18%)                | 7 (50%)                           | 11 (13%)                          |                        |
| BMI (kg/m <sup>2</sup> )                  | 23.27 ± 4.55            | 24.65 ± 3.08                      | 23.05 ± 4.73                      | 0.223 <sup>#</sup>     |
| Spleen size (mm)                          | 176.17 ± 10.97          | 160.64 ± 6.82                     | 178.69 ± 9.31                     | 0.000 <sup>#</sup>     |
| Parameters on POD3                        |                         |                                   |                                   |                        |
| ALT (U/L)                                 | 335.45 ± 38.34          | 211.34 ± 36.74                    | 354.03 ± 43.55                    | 0.228 <sup>#</sup>     |
| AST (U/L)                                 | 167.45 ± 26.77          | 93.39 ± 49.94                     | 179.50 ± 30.54                    | 0.261 <sup>#</sup>     |
| TB (mg/dL)                                | 3.25 ± 4.31             | 2.90 ± 0.38                       | 3.65 ± 2.05                       | 0.711 <sup>#</sup>     |
| Creatinine (mg/dL)                        | 0.97 ± 0.71             | 0.98 ± 0.73                       | 0.94 ± 0.61                       | 0.859 <sup>#</sup>     |
| Blood concentration of tacrolimus (ng/mL) | 4.84 ± 2.91             | 4.57 ± 2.85                       | 6.38 ± 2.89                       | 0.031 <sup>#</sup>     |
| Tacrolimus dosage (mg/day)                | 2.77 ± 1.04             | 2.74 ± 1.06                       | 2.92 ± 0.83                       | 0.542 <sup>#</sup>     |
| MMF dosage (mg/day)                       | 789.00 ± 35.34          | 789.11 ± 36.69                    | 788.60 ± 26.64                    | 0.996 <sup>#</sup>     |
| Anticoagulation ( <i>n</i> , %)           | 78 (78%)                | 12 (85%)                          | 66 (77%)                          | 0.194 <sup>&amp;</sup> |
| Child-Pugh (IQR)                          | 6 (3)                   | 5 (2)                             | 6 (3)                             | 0.094 <sup>&amp;</sup> |
| CYP3A5 GG/GG ( <i>n</i> , %)              | 27 (27%)                | 3 (21.4%)                         | 24 (27.9%)                        | 0.617 <sup>&amp;</sup> |

ALT, alanine aminotransferase; AST, aspartate aminotransferase; BMI, body mass index; MMF, mycophenolate mofetil; TB, total bilirubin.

<sup>#</sup>Between-group comparison was made using an independent *t*-test.

<sup>&</sup>Between-group comparison was made using the Mann–Whitney U test.
